# Supplementary material for: Epistatic interaction between PKD2 and ABCG2 influences the pathogenesis of hyperuricemia and gout
Source: PubMed Central journal article supplement (PMC6986014; doi:10.1186/s41065-020-0116-6), 2020-01-27
Supplement: 41065_2020_116_MOESM1_ESM.pdf [file 41065_2020_116_MOESM1_ESM.pdf]

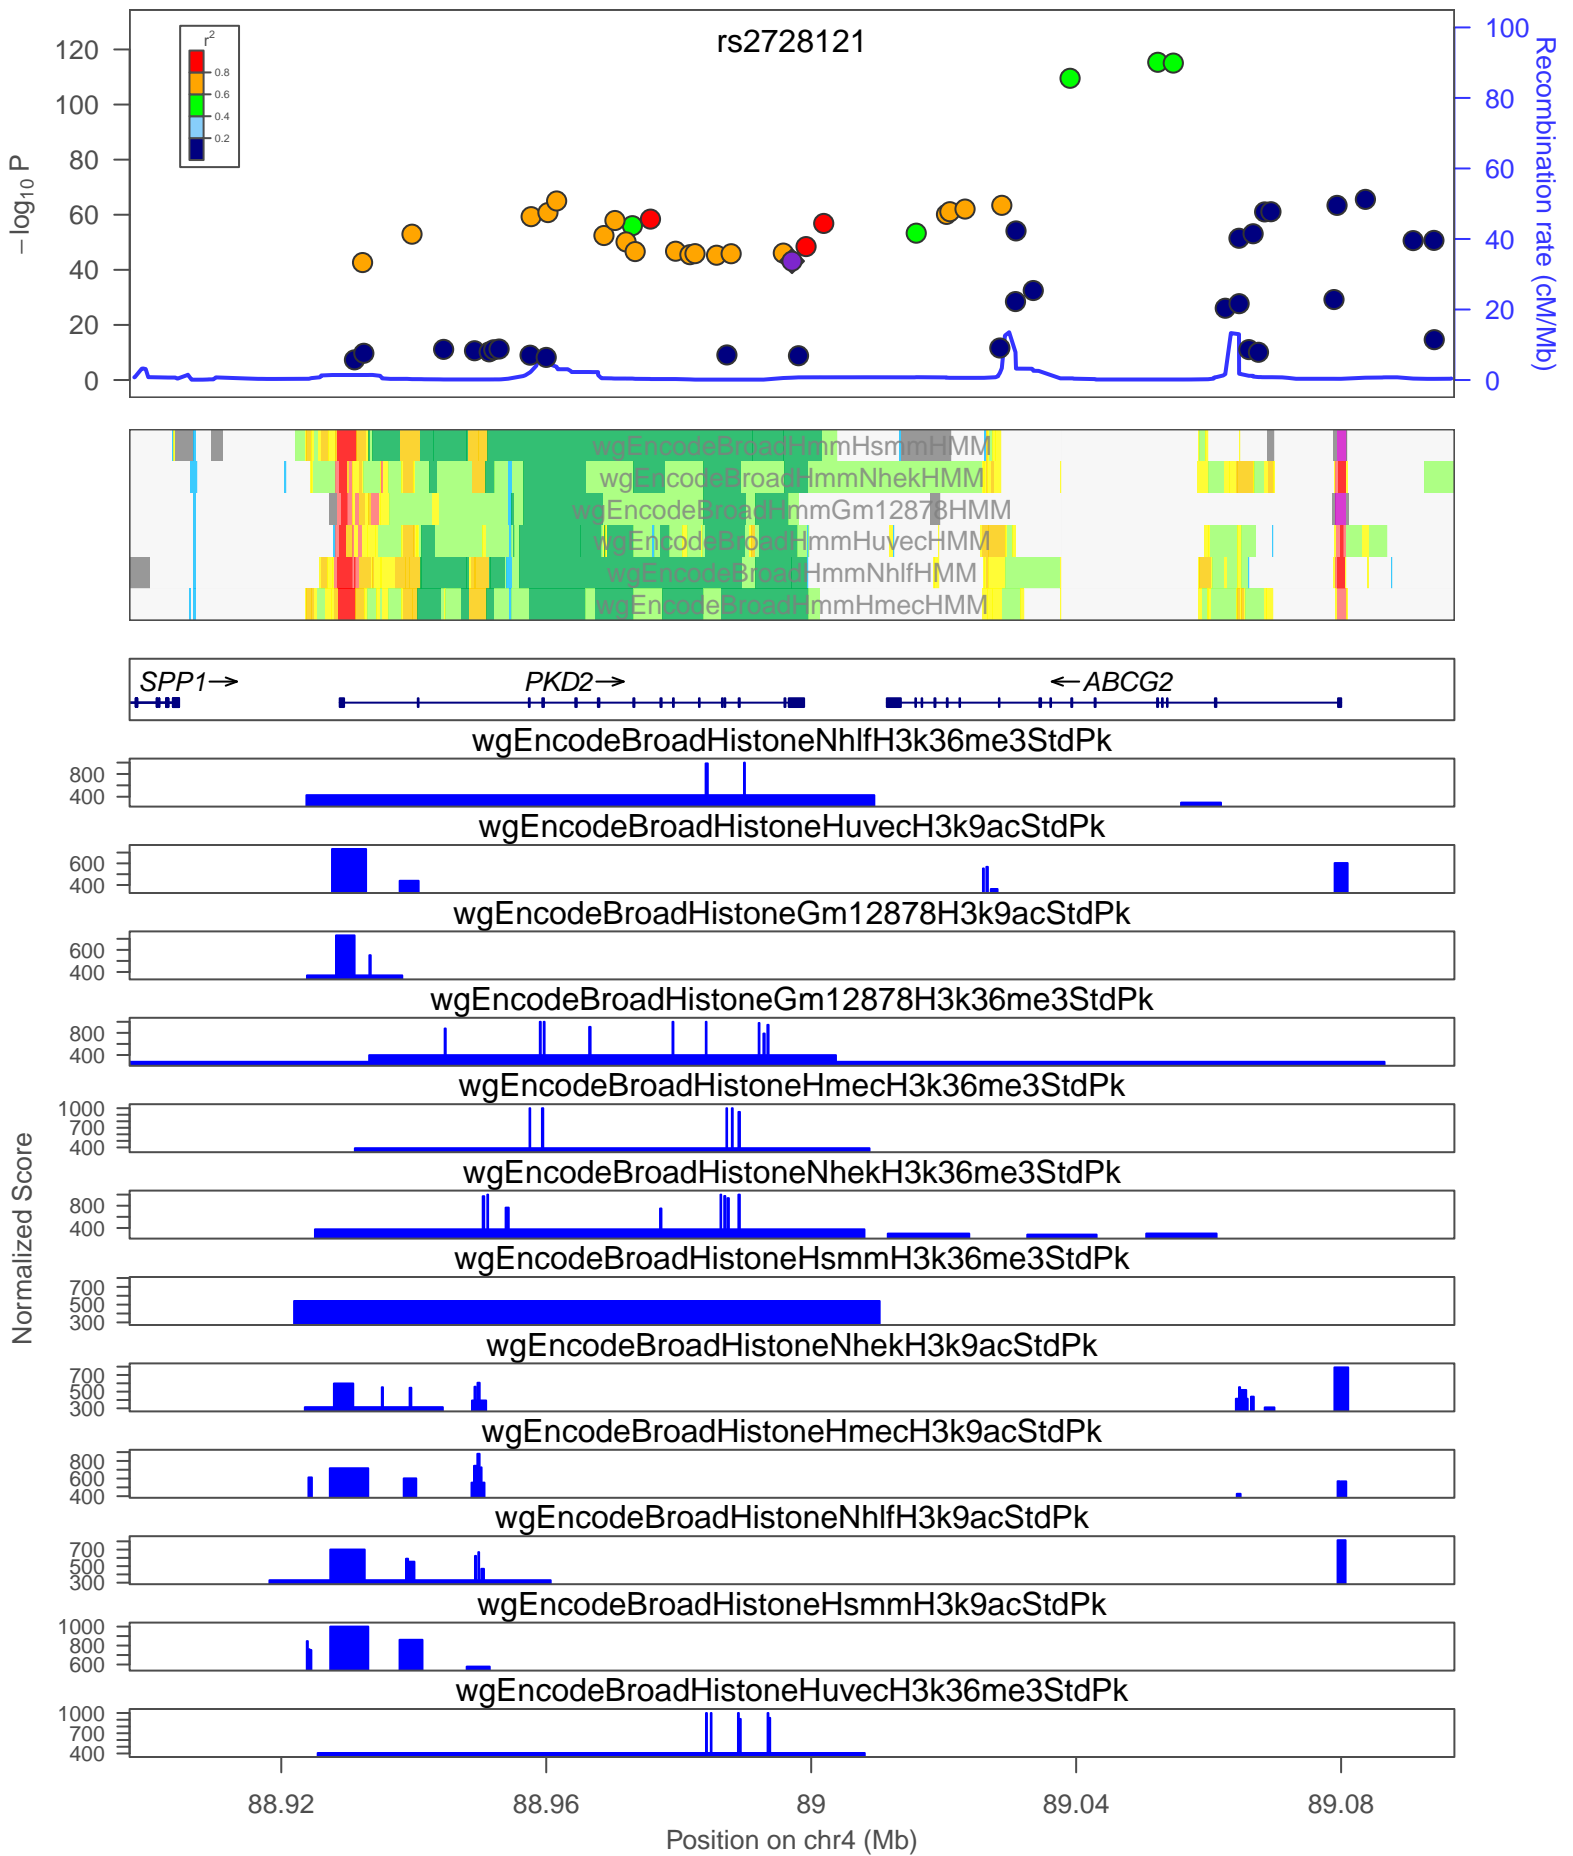

## Category Plot Legend

- Active Promoter
- Weak Promoter
- Inactive/poised Promoter
- Strong enhancer
- Weak/poised enhancer
- Insulator
- Transcriptional transition/elongation
- Weak transcribed
- Polycomb-repressed
- Heterochromatin; low signal; Repetitive/Copy Number Variation
