# Supplementary material for: Epistatic interaction between PKD2 and ABCG2 influences the pathogenesis of hyperuricemia and gout
Source: PubMed Central journal article supplement (PMC6986014; doi:10.1186/s41065-020-0116-6), 2020-01-27

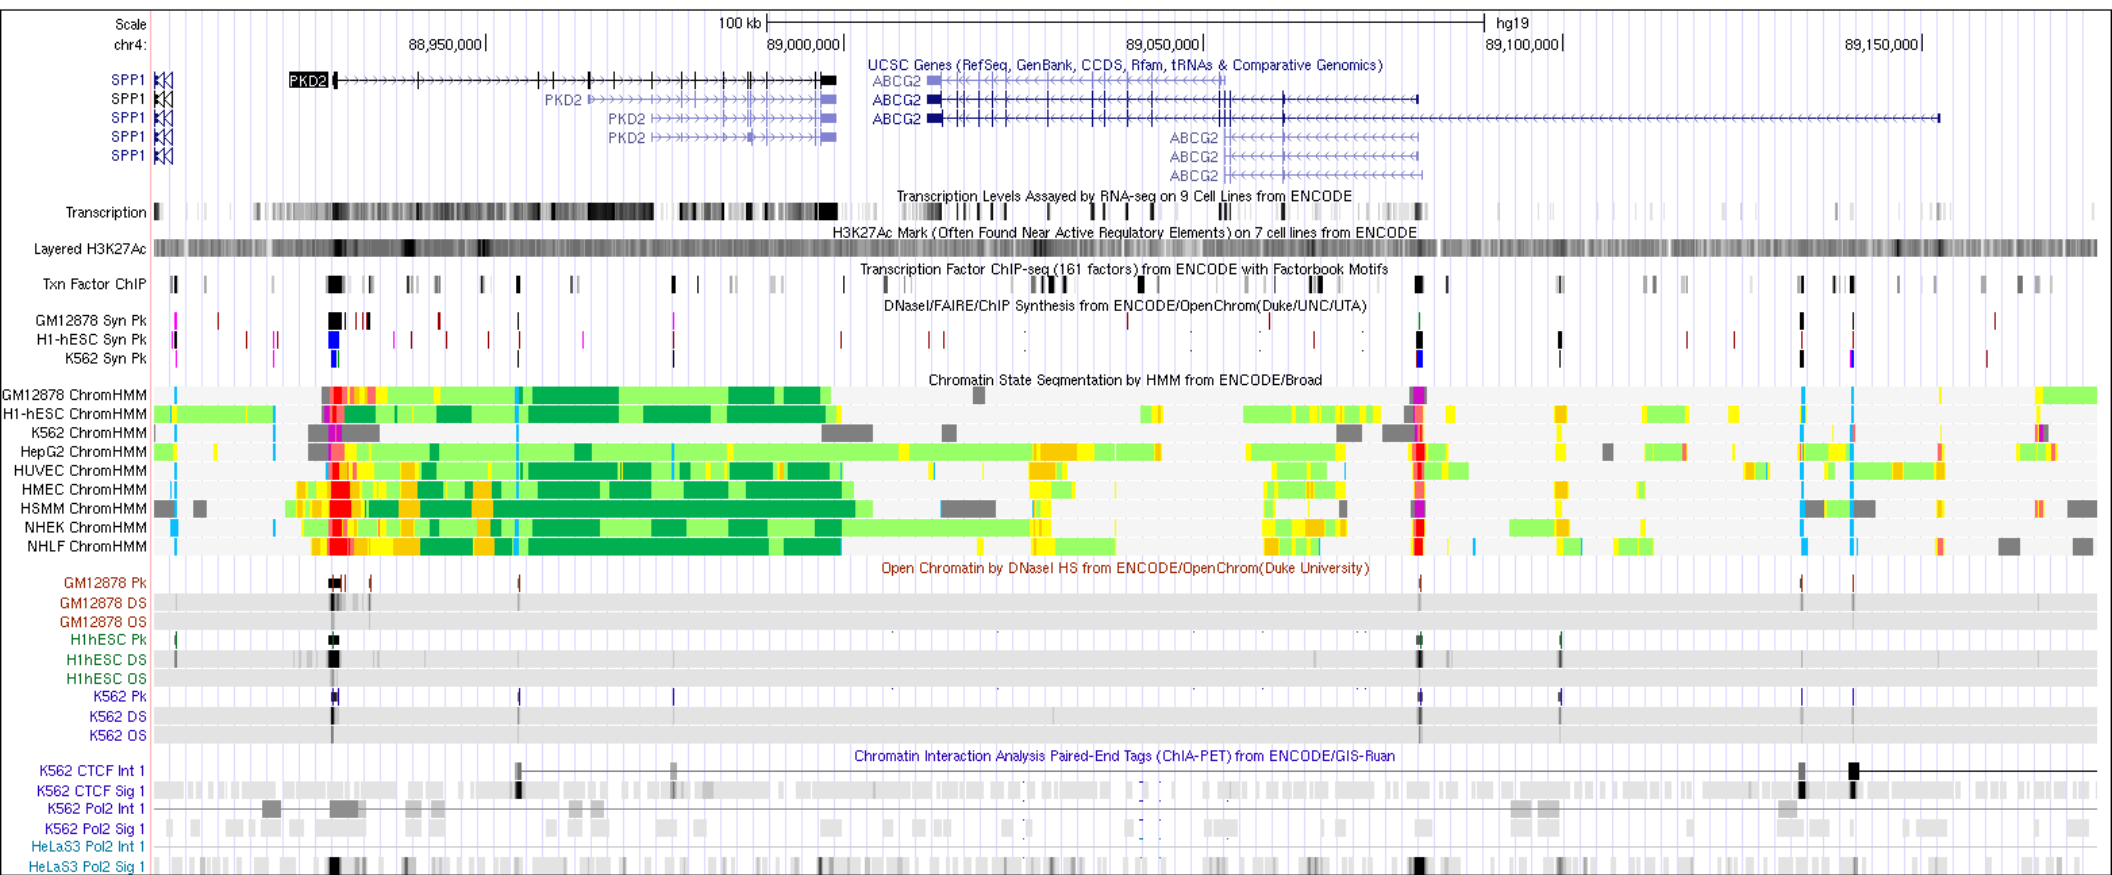

Supplement: 41065_2020_116_MOESM2_ESM.pdf [file 41065_2020_116_MOESM2_ESM.pdf]
