# Supplementary material for: Epistatic interaction between PKD2 and ABCG2 influences the pathogenesis of hyperuricemia and gout
Source: PubMed Central journal article supplement (PMC6986014; doi:10.1186/s41065-020-0116-6), 2020-01-27
Supplement: 41065_2020_116_MOESM3_ESM.pdf [file 41065_2020_116_MOESM3_ESM.pdf]

S. Table 1. Characteristics of all participants in our study

| Characteristics              | Control        | HUA            |
|------------------------------|----------------|----------------|
| Number                       | 2945           | 1387           |
| Male (%)                     | 70.53%         | 76.42%         |
| Age                          | 69.00 (9.25)   | 67.91 (11.93)  |
| Height (cm)                  | 161.37 (7.52)  | 162.63 (7.54)  |
| Weight (kg)                  | 63.71 (9.96)   | 68.56 (11.12)  |
| BMI                          | 24.43 (3.24)   | 25.88 (3.52)   |
| Serum urate (umol/l)         | 300.73 (63.13) | 482.30 (61.14) |
| Total bilirubin (umol/l)     | 19.39 (8.39)   | 18.98 (7.59)   |
| Glucose (mmol/L)             | 5.60 (1.67)    | 5.59 (1.31)    |
| Cholesterol (mmol/L)         | 4.75 (0.93)    | 5.06 (1.52)    |
| Triglyceride (mmol/L)        | 1.51 (0.96)    | 2.23 (1.76)    |
| Creatinine (umol/L)          | 71.75 (17.61)  | 89.80 (29.24)  |
| Blood urea nitrogen (mmol/L) | 5.48 (2.13)    | 6.24 (1.95)    |

HUA, hyperuricemia. Data is shown as mean (SD).
